# Supplementary material
Source: PubMed Central journal article supplement (PMC7087310)

# Detection and molecular characterization of canine circovirus circulating in northeastern China during 2014–2016

Lingdi Niu<sup>a</sup>, ZhengWang<sup>a</sup>, Lili Zhao<sup>b</sup>, Yu Wang<sup>a, b</sup>, XingyangCui<sup>a</sup>, YunjiaShi<sup>a</sup>, Hongyan Chen<sup>b\*</sup>, Junwei Ge<sup>a,c\*</sup>

<sup>a</sup> *College of Veterinary Medicine, Northeast Agricultural University, Harbin 150030, China*

<sup>b</sup> *Heilongjiang Provincial Key Laboratory of Laboratory Animal and Comparative Medicine, State Key Laboratory of Veterinary Biotechnology, Harbin Veterinary Research Institute, Chinese Academy of Agricultural Sciences, Harbin 150069, P.R. China*

<sup>c</sup> *Northeastern Science Inspection Station, China Ministry of Agriculture Key Laboratory of Animal Pathogen Biology, Harbin 150030, China*

*\* Corresponding authors.*

Hongyan Chen

*Address: Harbin Veterinary Research Institute, Chinese Academy of Agricultural Sciences, No. 678 Haping Rd, Harbin 150069, China.*

*Tel.: +86 451 85936123; fax: +86 451 82734181.*

*E-mail addresses: [chenhongyan@caas.cn](mailto:chenhongyan@caas.cn)*

Junwei Ge

*Address: College of Veterinary Medicine, Northeast Agricultural University, Harbin 150030, China*

*Tel.: +86 451 55190385; fax: +86 451 55103336.*

*E-mail addresses: [gejunwei@neau.edu.cn](mailto:gejunwei@neau.edu.cn)*

**Table S1 Primers used in this study**

| Target virus  | Primer name   | Primer sequences (5'-3')       | Target gene   | Amplicon size (bp) | Annealing temperature (°C) |
|---------------|---------------|--------------------------------|---------------|--------------------|----------------------------|
| CanineCV      | CanineCV11F   | 5' TGTATAACTACTGAAAGATAA 3'    |               | 1129               | 49                         |
|               | CanineCV11L   | 5' GGTGCCGGGTAATACTAT 3'       |               |                    |                            |
|               | CanineCVgF    | 5' GCGAGAGCTGCTCCTTAT 3'       |               | 1756               | 49                         |
|               | CanineCVgL    | 5'CGGCCACAGATTAAGTACTT 3'      |               |                    |                            |
|               | CanineCVF     | 5' AGGAGGATGCCGTGAA 3'         |               | 562                | 49                         |
|               | CanineCVL     | 5' CCATAGAAGTCATCCAGAAT 3'     |               |                    |                            |
|               | CanineCV1-FW  | 5' CGTATCCGGAGACCTACGTCA 3'    |               | 2040               | 55                         |
|               | CanineCV1-REV | 5'TTCGTCTCTTTCAGTTTCTCTACAG 3' |               |                    |                            |
| CDV           | CDV1          | ACAGGATTGCTGAGGACCTAT          | Nucleoprotein | 287                | 59                         |
|               | CDV2          | CAAGATAACCATGTACGGTGC          |               |                    |                            |
| CPV-2         | Hfor          | CAGGTGATGAATTTGCTACA           |               | 611                | 49                         |
|               | Hrev          | CATTTGGATAAACTGGTGGT           |               |                    |                            |
| coronaviruses | IN-2deg       | 5'-GGGDTGGGAYTAYCCHAARTGYGA-3' | polymerase    | 452                | 49                         |
|               | IN-4deg       | 5'-TARCAVACAACISYRTCRTCA-3'    |               |                    |                            |
| caliciviruses | P290d         | GATTACTCCASSTGGGAYTCMAC        | RdRp          | 319                | 48                         |
|               | P289d         | TGACGATTTTCATCATCMCCRTA        |               |                    |                            |
| astrovirus    | MA2           | GGCTTTACCCACATICCAAA           | Polyprotein   | 387                | 55                         |
|               | MA4           | TGGACCCGCTATGATGGCACIAT        |               |                    |                            |
| rotaviruses   | Con 2         | ATTTCCGACCATTTATAACC           | VP4           | 876                | 50                         |
|               | Con 3         | TGGCTTCGCCATTTTATAGACA         |               |                    |                            |
|               | S9-as         | ACTTGCCACCAYYTYTTCCAATT        | VP7           | 400                | 55                         |
|               | S9-csv        | ATGAATGGTTATGYAAAYCCDATGGA     |               |                    |                            |

**Table S2** Reference strains for Circovirus used in the paper

| Reference strains or other circovirus | GenBank Accession No. | Source  | Collection date |
|---------------------------------------|-----------------------|---------|-----------------|
| XF16                                  | MF797786              | China   | Apr-2016        |
| K1                                    | MK731982              | China   | Apr-2016        |
| C24                                   | MK731981              | China   | Apr-2016        |
| C85                                   | MK944080              | China   | Apr-2016        |
| C79                                   | MK944079              | China   | Apr-2016        |
| CanineCV 214                          | JQ821392              | USA     | 2011            |
| CanineCV Ha13                         | KF887949              | Germany | 22-Jul-2013     |
| CanineCV JZ98/2014                    | KT946839              | China   | 2014            |
| CanineCV CD17/2016                    | MG266899              | China   | 31-Oct-2016     |
| CanineCV PE8575/1-13                  | KT734823              | Italy   | Jul-2013        |
| CanineCV TE7482-13                    | KT734822              | Italy   | Apr-2013        |
| CanineCV TE6685/1-13                  | KT734821              | Italy   | Mar-2013        |
| CanineCV AZ663/1-13                   | KT734820              | Italy   | Feb-2013        |
| CanineCV AZ5586-13                    | KT734819              | Italy   | Nov-2013        |
| CanineCV AZ5212/1-14                  | KT734817              | Italy   | Oct-2014        |
| CanineCV AZ4438-13                    | KT734816              | Italy   | Sep-2013        |
| CanineCV AZ4133/1-13                  | KT734815              | Italy   | Jul-2013        |
| CanineCV TE4016-13                    | KT734814              | Italy   | Feb-2013        |
| CanineCV AZ2972-13                    | KT734813              | Italy   | May-2013        |
| CanineCV CB6293/1-14                  | KT734812              | Italy   | Nov-2014        |
| CanineCV FUBerlin-JRS                 | KT283604              | Germany | Jun-2014        |
| CanineCV Bari / 411-13                | KJ530972              | Italy   | Jun-2013        |
| CanineCV UCD1-1698                    | KC241982              | USA     | Oct-2011        |

---

|                     |          |       |             |
|---------------------|----------|-------|-------------|
| CanineCV UCD2-32162 | KC241984 | USA   | Oct-2011    |
| CanineCV UCD3-478   | KC241983 | USA   | Oct-2011    |
| CanineCV 204        | MG279141 | China | 2017        |
| CanineCV 205        | MG279140 | China | 2017        |
| CanineCV 384        | MG279139 | China | 2017        |
| CanineCV 388        | MG279138 | China | 2017        |
| CanineCV 390        | MG279137 | China | 2017        |
| CanineCV 391        | MG279136 | China | 2017        |
| CanineCV 201        | MG279135 | China | 2017        |
| CanineCV 394        | MG279134 | China | 2017        |
| CanineCV 395        | MG279133 | China | 2017        |
| CanineCV 202        | MG279131 | China | 2017        |
| CanineCV 177        | MG279130 | China | 2017        |
| CanineCV 178        | MG279129 | China | 2017        |
| CanineCV 179        | MG279128 | China | 2017        |
| CanineCV 180        | MG279127 | China | 2017        |
| CanineCV 181        | MG279126 | China | 2017        |
| CanineCV 182        | MG279125 | China | 2017        |
| CanineCV 183        | MG279124 | China | 2017        |
| CanineCV 185        | MG279123 | China | 2017        |
| CanineCV 176        | MG279122 | China | 2017        |
| CanineCV 186        | MG279121 | China | 2017        |
| CanineCV 198        | MG279120 | China | 2017        |
| CanineCV 199        | MG279119 | China | 2017        |
| CanineCV 102        | MG279118 | China | 2017        |
| CanineCV OH19098-1  | MF457592 | USA   | 21-Aug-2015 |

---

---

|              |          |           |          |
|--------------|----------|-----------|----------|
| CanineCV 398 | MG279132 | China     |          |
| UBA-Baires   | MK033608 | Argentina | Mar-2016 |
| WM72         | KY388503 | China     | 2015     |
| WM74         | KY388502 | China     | 2015     |
| WM76         | KY388501 | China     | 2015     |
| WM77         | KY388500 | China     | 2015     |
| WM79         | KY388499 | China     | 2015     |
| WM83         | KY388498 | China     | 2015     |
| WM84         | KY388497 | China     | 2015     |
| XXT242       | KY388496 | China     | 2015     |
| XXT243       | KY388495 | China     | 2015     |
| YL11         | KY388494 | China     | 2016     |
| WM62         | KY388493 | China     | 2015     |
| WM66         | KY388492 | China     | 2015     |
| WM63         | KY388491 | China     | 2015     |
| JZ82         | KY388490 | China     | 2014     |
| JZ85         | KY388489 | China     | 2014     |
| LA128        | KY388488 | China     | 2014     |
| LA237        | KY388487 | China     | 2014     |
| LA280        | KY388486 | China     | 2014     |
| WM46         | KY388485 | China     | 2015     |
| WM48         | KY388484 | China     | 2015     |
| WM60         | KY388483 | China     | 2015     |
| GL51         | KY388482 | China     | 2015     |
| JZ50         | KY388481 | China     | 2014     |
| GL33         | KY388480 | China     | 2015     |

---

**Table S3 Individual infectious agents in the real-time PCR canine diarrhea panel of dogs**

| Pathogen            | Dogs             |                            |                                                  |                                                         | P value of Diarrheic and Control |                |
|---------------------|------------------|----------------------------|--------------------------------------------------|---------------------------------------------------------|----------------------------------|----------------|
|                     | Diarrheic (96) n | Healthy (%) n=145          |                                                  |                                                         |                                  |                |
|                     | (%)              | Healthy always<br>(%) n=10 | Diarrheic in recent<br>half a year (n=21)<br>(%) | Unknown situation<br>in recent half a<br>year(n=14) (%) |                                  | Total (%) n=45 |
| CPV-2*              | 51/96(53.1)      | 0/10(0)                    | 0/21(0)                                          | 0/14(0)                                                 | 0/45 (0)                         | <0.001         |
| CCV*                | 15/96(15.6)      | 0/10(0)                    | 2/21(9.5)                                        | 1/14(7.1)                                               | 3/45 (6.7)                       | 0.009          |
| CCoV                | 0/96(0)          | 0/10(0)                    | 0/21(0)                                          | 0/14(0)                                                 | 0/45 (0)                         | -              |
| rotaviruses         | 0/96(0)          | 0/10(0)                    | 0/21(0)                                          | 0/14(0)                                                 | 0/45 (0)                         | -              |
| caliciviruses       | 5/96(5.2)        | 0/10(0)                    | 1/21(4.8)                                        | 0/14(0)                                                 | 1/45 (2.2)                       | 0.146          |
| astroviruses        | 0/96(0)          | 0/10(0)                    | 0/21(0)                                          | 0/14(0)                                                 | 0/45 (0)                         | -              |
| Salmonella spp      | 2/96(2.1)        | 0/10(0)                    | 1/21(4.8)                                        | 1/14 (7.1)                                              | 2/45 (4.4)                       | 0.364          |
| Cryptosporidium spp | 6/96(6.2)        | 1/10(10)                   | 2/21(9.5)                                        | 1/14 (7.1)                                              | 4/45 (8.9)                       | 0.828          |
| ETEC*               | 34/96(35.4)      | 1/10(10)                   | 4/21(19.0)                                       | 1/14 (7.1)                                              | 6/45 (13.3)                      | <0.001         |
| STEC**              | 8/96(8.3)        | 0/39(0)                    | 2/21(9.5)                                        | 0/14 (0)                                                | 2/45 (4.4)                       | 0.063          |

\*Significantly (P < 0.05) different between Diarrhea Group and Control Group.

\*\*Significantly (P < 0.1) different between Diarrhea Group and Control Group

**Fig.S1 Phylogenetic analysis of canine circovirus and other circovirus (a)** Neighbor-joining trees are based on the fulllength genome. **(b)** Neighbor-joining trees are based on the rep protein gene. **(c)** Neighbor-joining trees are based on the cap protein gene. For phylogenetic tree construction, the reference strains and GenBank accession numbers are as reported in Table 2. A statistical support was provided by bootstrapping over 1,000 replicates. The scale bars indicate the estimated numbers of nucleotide or amino acid substitutions. Filled circled reference strains first mentioned in this article.

**(a)**

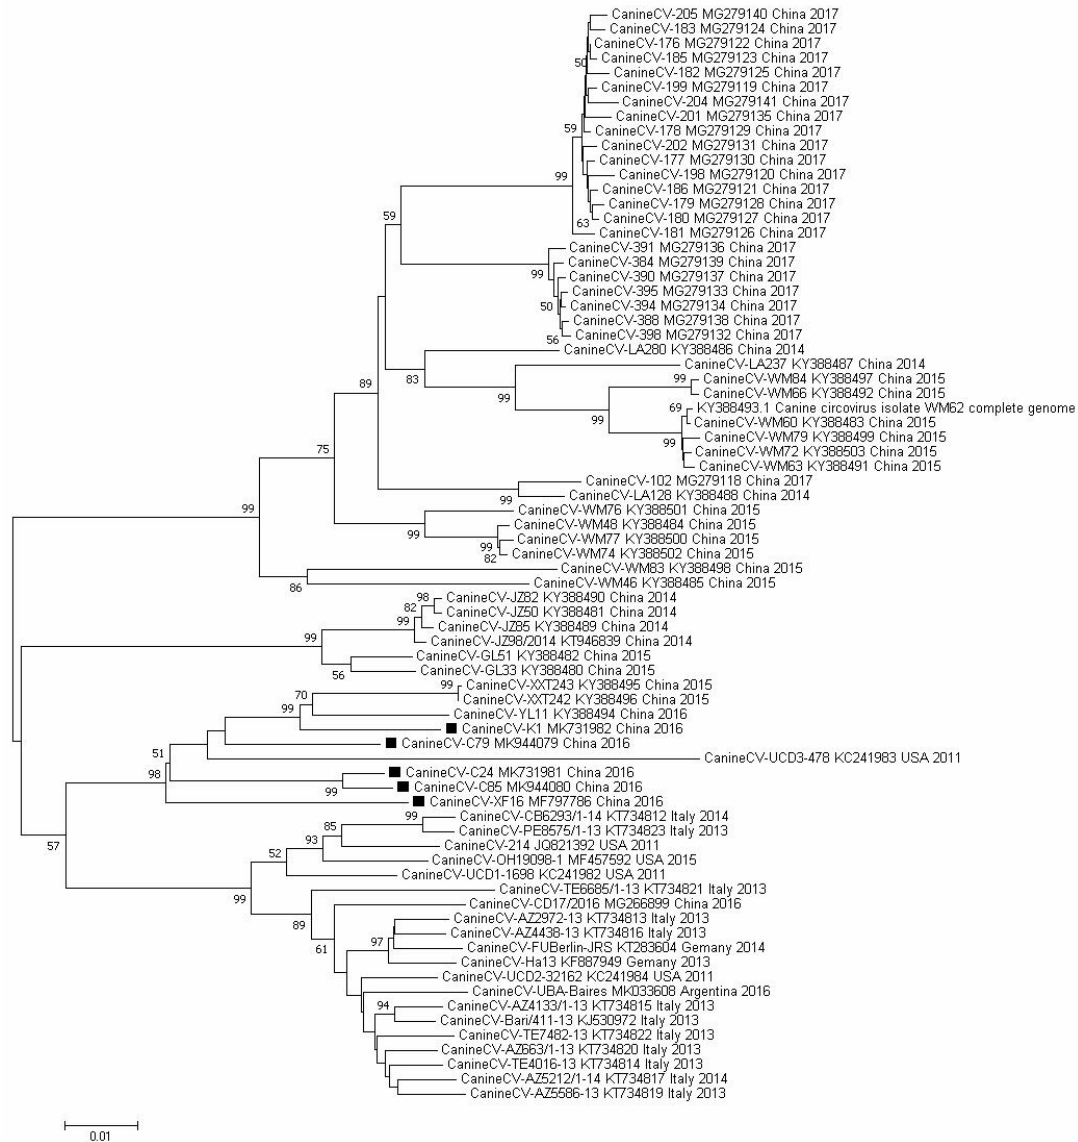

(b)

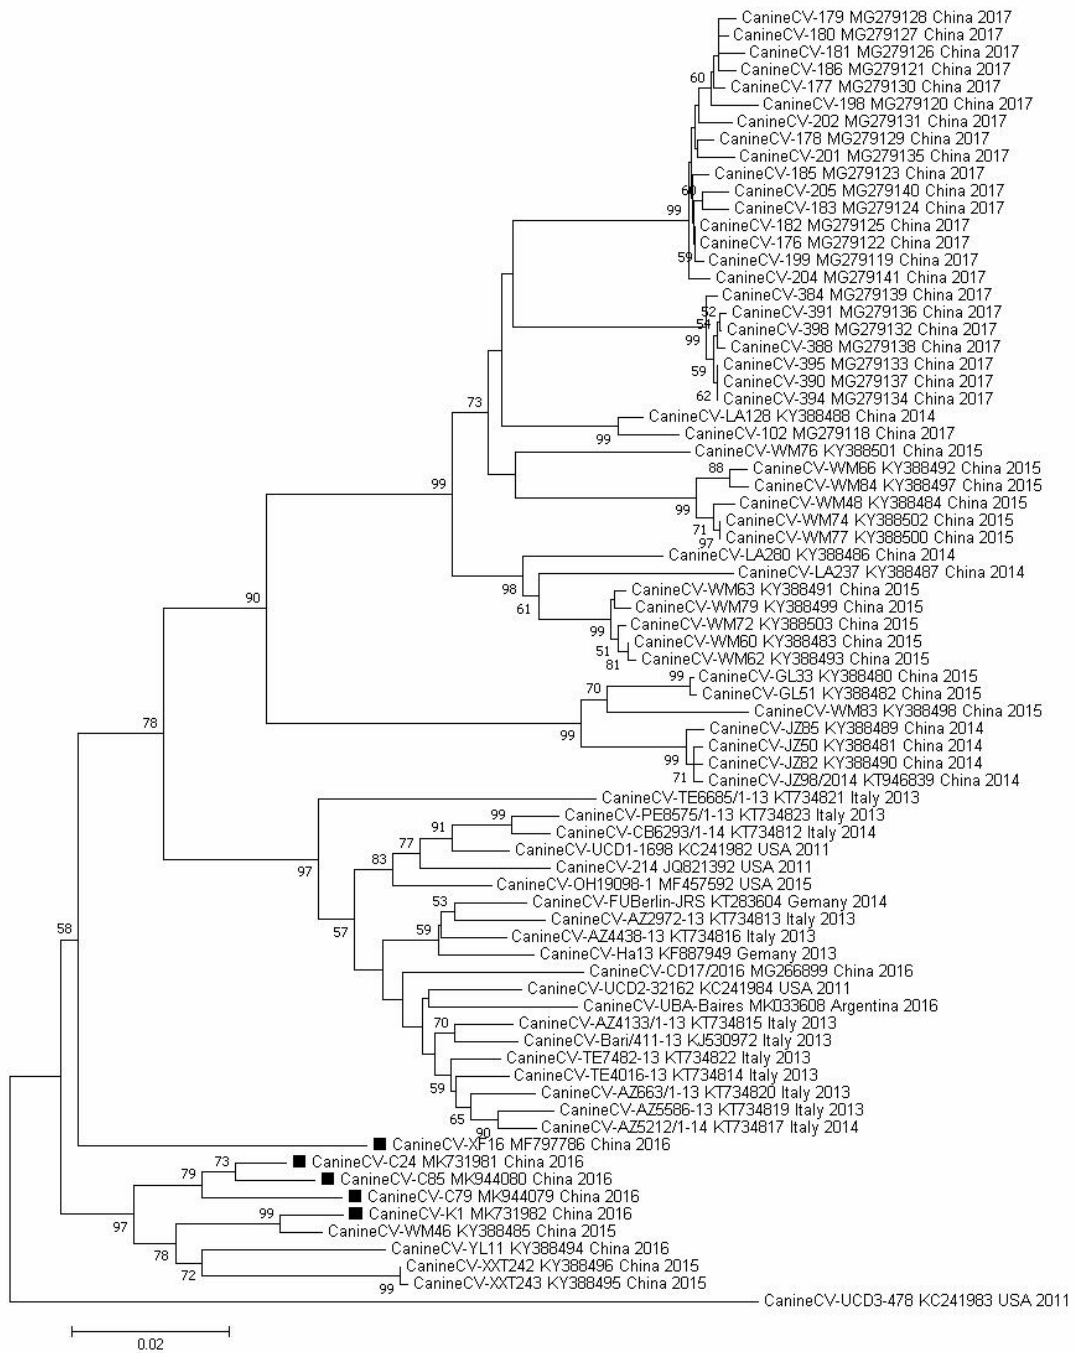



(c)

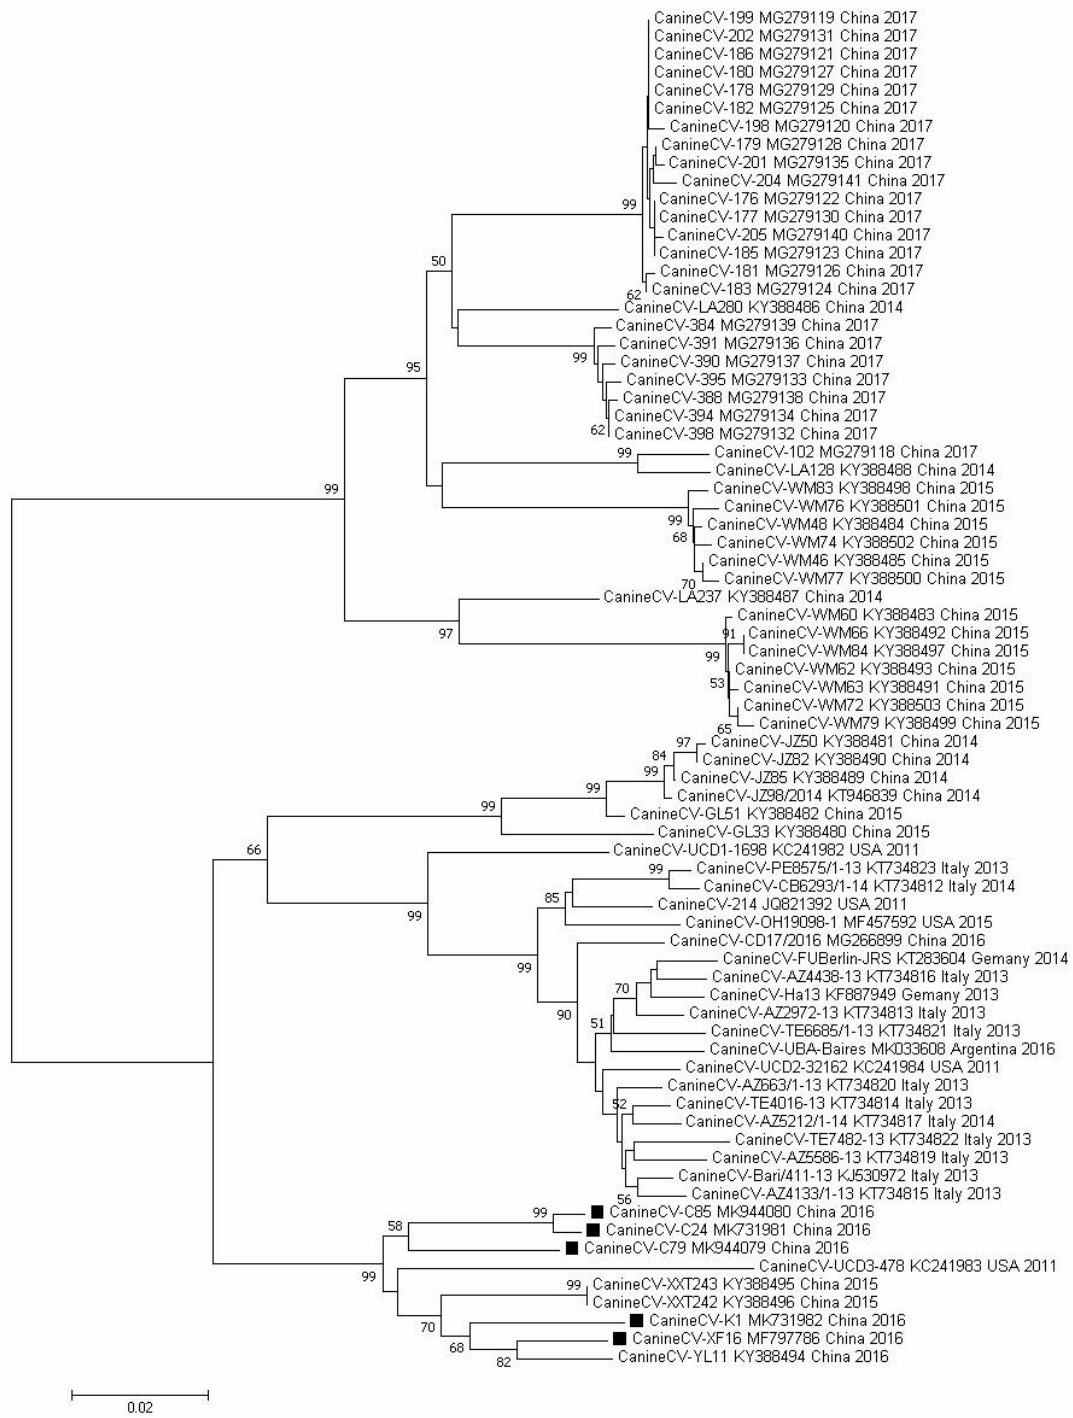

Supplement: 705_2019_4433_MOESM1_ESM.pdf [file 705_2019_4433_MOESM1_ESM.pdf]
